# Supplementary material for: Bi-doped BaBiO3 (x = 0%, 5%, 10%, 15%, and 20%) perovskite oxides by a sol–gel method: comprehensive biological assessment and RhB photodegradation
Source: Royal Society of Chemistry journal article supplement (doi:10.1039/d3ra06354b), 2024-01-01
Supplement: d3ra06354b1.pdf [file d3ra06354b1.pdf]

## Supporting Information

### **BaBiO<sub>3</sub> doping Bi (x = 0, 5, 10, 15, and 20%) perovskite oxides by Sol-gel method: Comprehensive biological assessment and RhB photodegradation**

Wissam BOUCHA<sup>1</sup>, Faïçal DJANI<sup>1\*</sup>, Djamel Eddine MAZOUZI<sup>1</sup>, Rima Nour Elhouda TIRI<sup>2,3</sup>, Soufiane MAKHLOUFI<sup>1</sup>, Chaker LAIADI<sup>4</sup>, Arturo MARTÍNEZ-ARIAS<sup>5</sup>, Aysenur AYGUN<sup>2,3</sup>, Fatih SEN<sup>2,3\*</sup>

<sup>1</sup>Molecular Chemistry and Environment Laboratory, Mohammed KHIDER University Biskra, BP:145 RP, Biskra, 07000, Algeria.

<sup>2</sup>Sen Research Group, Department of Biochemistry, University of Dumlupınar, 43000, Kütahya, Türkiye.

<sup>3</sup>SRG Incorporated Company, Kutahya Design & Technopole, Calca OSB Neighbourhood, 43100 Kutahya, Türkiye.

<sup>4</sup>Department of Chemical Engineering, Mohammed KHIDER University - Biskra 07000, Algeria.

<sup>5</sup>Instituto de Catálisis y Petroleoquímica, CSIC, C/Marie Curie 2, Campus de Cantoblanco, 28049 Madrid, Spain.

\*Corresponding author: [f.djani@univ-biskra.dz](mailto:f.djani@univ-biskra.dz); [fatihsen1980@gmail.com](mailto:fatihsen1980@gmail.com).

**Table S1.** Structural parameters of BaBiO<sub>3</sub> - BaCO<sub>3</sub> (0%. 5%. 10%. 15 %. 20% excess Bi) nanoparticles.

|                | oxide              | Cristal system | Lattice Parameters |        |        |         |          | Cell volume(Å <sup>3</sup> ) | Crystallite size (Å) |
|----------------|--------------------|----------------|--------------------|--------|--------|---------|----------|------------------------------|----------------------|
|                |                    |                | a (Å)              | b (Å)  | c (Å)  | α=β (°) | γ (°)    |                              |                      |
| Pure BBO       | BaBiO <sub>3</sub> | Monoclinic     | 10.6322            | 6.1357 | 6.1853 | 90      | 125.380  | 328.9852                     | 515.5                |
|                | BaCO <sub>3</sub>  | Orthorhombic   | 5.314              | 8.904  | 6.43   | 90      | 90       | 304.241                      | 545                  |
| 5 % excess Bi  | BaBiO <sub>3</sub> | Monoclinic     | 10.6310            | 6.1358 | 6.1854 | 90      | 125.401  | 328.8833                     | 639                  |
|                | BaCO <sub>3</sub>  | Orthorhombic   | 5.314              | 8.904  | 6.43   | 90      | 90       | 304.241                      | 545                  |
| 10 % excess Bi | BaBiO <sub>3</sub> | Monoclinic     | 10.6151            | 6.1344 | 6.1818 | 90      | 125.345  | 328.3523                     | 639                  |
|                | BaCO <sub>3</sub>  | Orthorhombic   | 5.314              | 8.904  | 6.43   | 90      | 90       | 304.241                      | 712                  |
| 15 % excess Bi | BaBiO <sub>3</sub> | Monoclinic     | 10.6227            | 6.1325 | 6.1809 | 90      | 125.376  | 328.3142                     | 489.5                |
|                | BaCO <sub>3</sub>  | Orthorhombic   | 5.314              | 8.904  | 6.43   | 90      | 90       | 304.241                      | 712                  |
| 20 % excess Bi | BaBiO <sub>3</sub> | Monoclinic     | 10.6107            | 6.1262 | 6.1731 | 90      | 125.4127 | 327.0472                     | 548                  |
|                | BaCO <sub>3</sub>  | Orthorhombic   | 5.314              | 8.904  | 6.43   | 90      | 90       | 304.241                      | 562                  |
